# Supplementary material for: A strategy for improving the performance of perovskite red light-emitting diodes by controlling the growth of perovskite crystal
Source: Royal Society of Chemistry journal article supplement (doi:10.1039/c9tc04124a), 2019-01-01
Supplement: c9tc04124a1.pdf [file c9tc04124a1.pdf]

Supporting information

## A Strategy for Improving Performance of Polycrystalline Perovskite Red Light-Emitting Diodes by Modifying the Growth of Perovskite Crystal

Guohui Huang<sup>1</sup>, Gancheng Xie<sup>1</sup>, Juanhong Wang<sup>1</sup>, Congbiao Jiang<sup>1</sup>, Chaohuang Mai<sup>1</sup>, Yu Luo<sup>1</sup>, Jian Wang<sup>1</sup>, Junbiao Peng<sup>1\*</sup>, Yong Cao<sup>1</sup>

<sup>1</sup>Institute of Polymer Optoelectronic Materials and Devices, State Key Laboratory of Luminescent Materials and Devices, South China University of Technology, Guangzhou 510640, China

\*E-mail: psjbpeng@scut.edu.cn (J. Peng)

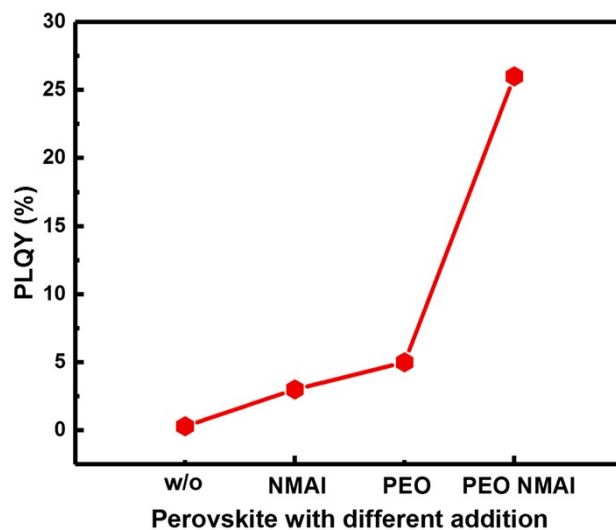

Figure S1 PLQY of Cs<sub>0.8</sub>FA<sub>0.2</sub>PbI<sub>3</sub> perovskite films processed with different additions.

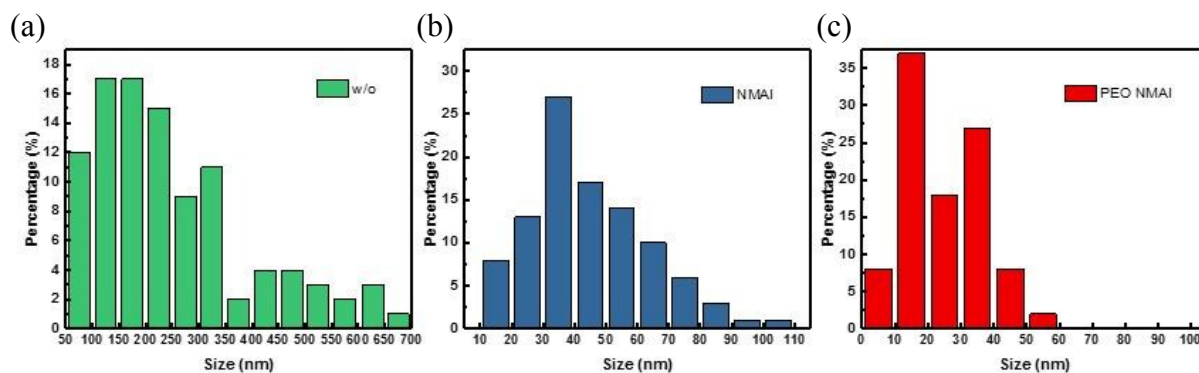

**Figure S2.** Histograms of grain size distributions of  $\text{Cs}_{0.8}\text{FA}_{0.2}\text{PbI}_3$  films processed a) with no-addition; b) with containing NMAI; c) with containing PEO and NMAI.

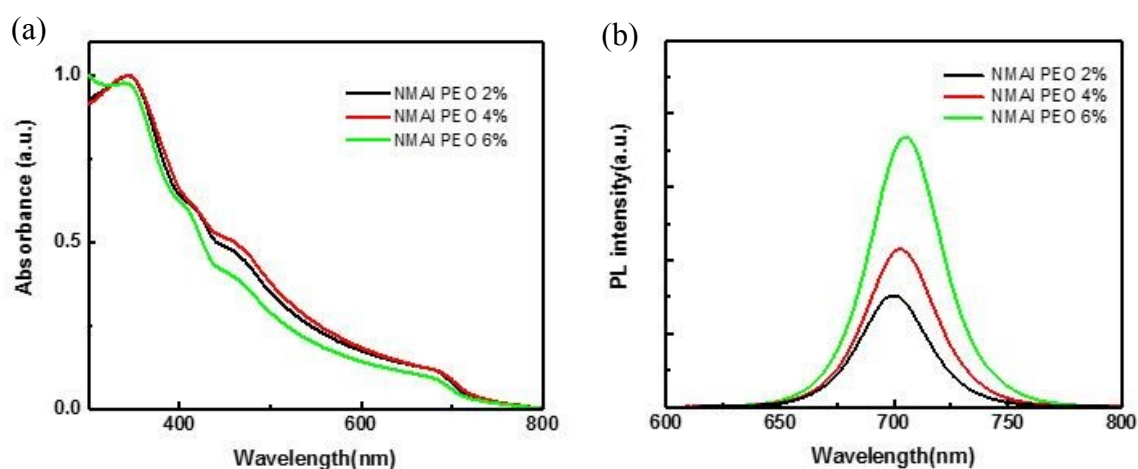

**Figure S3.** a) The photoluminescence (PL) spectra and b) UV–visible absorption spectra of  $\text{Cs}_{0.8}\text{FA}_{0.2}\text{PbI}_3$  films processed with NMAI and PEO 2%, 4% and 6% (weight ratio) added.

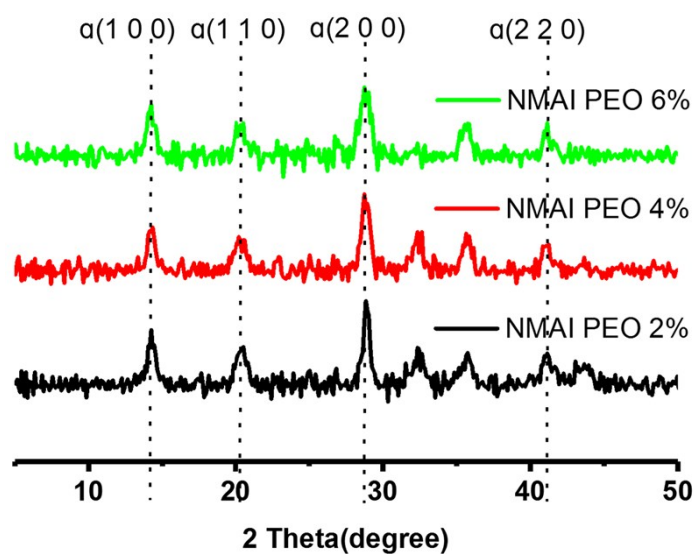

**Figure S4** XRD patterns of glass/perovskite films processed with NMAI and PEO 2%, 4% and 6% (weight ratio) added.

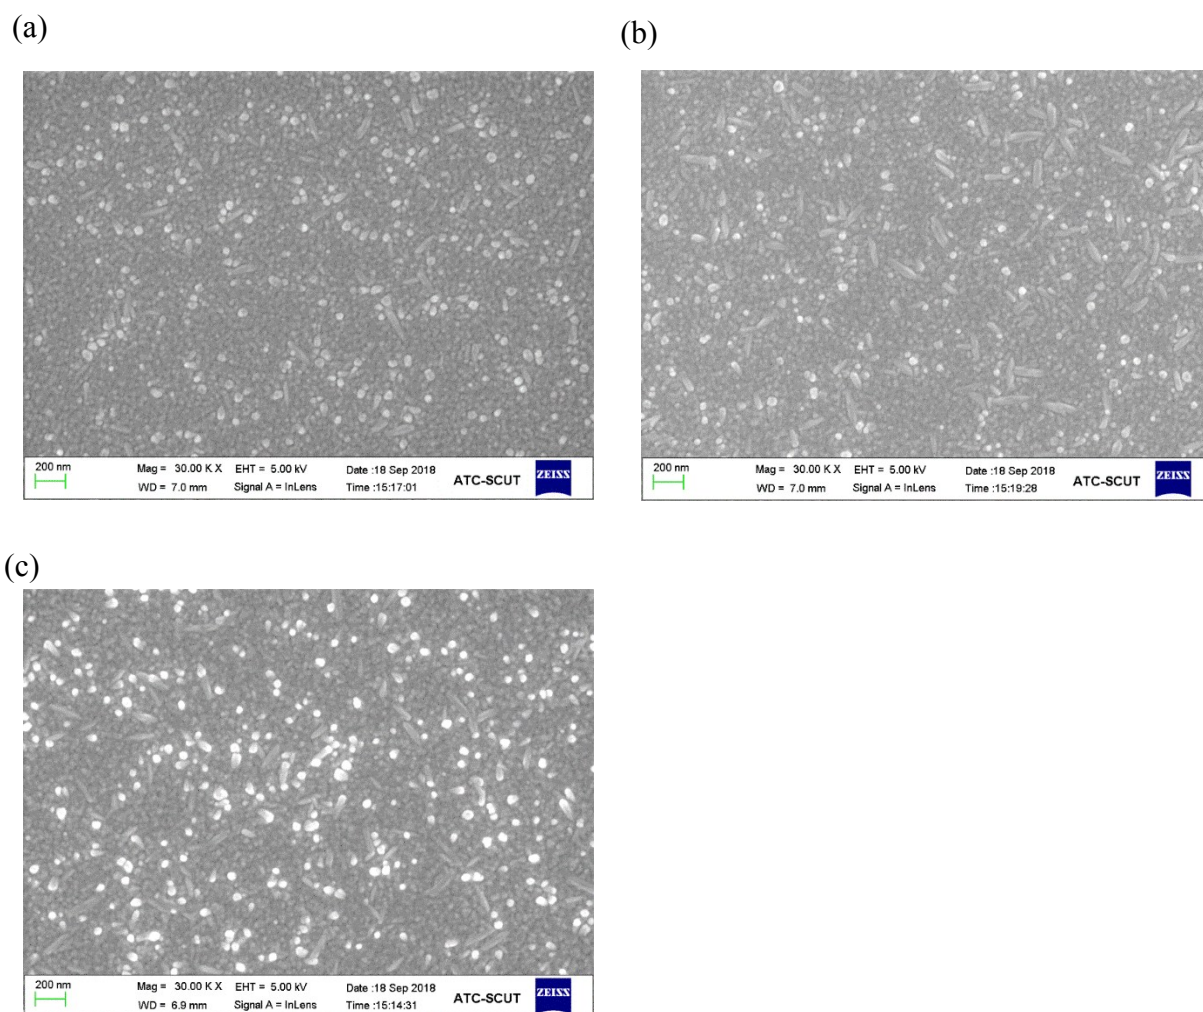

**Figure S5.** SEM images showing the surface morphology of  $\text{Cs}_{0.8}\text{FA}_{0.2}\text{PbI}_3$  films processed a) with NMAI and PEO a)2%, b)4%, c)6% (weight ratio) added.

**Table S1.** Multi-exponential fitting parameters for the photoluminescence decay profiles shown in Figure 2c.

| Device   | $\tau_{\text{avg}}(\text{ns})$ | $\tau_1(\text{ns})$ | $\tau_2(\text{ns})$ | $\tau_3(\text{ns})$ |
|----------|--------------------------------|---------------------|---------------------|---------------------|
| PEO      | 35.9                           | 1.9                 | 21.4                | 77.1                |
| NMAI     | 5.7                            | 1.1                 | 3.8                 | 13.7                |
| PEO NMAI | 71.6                           | 7.0                 | 37.8                | 120.9               |

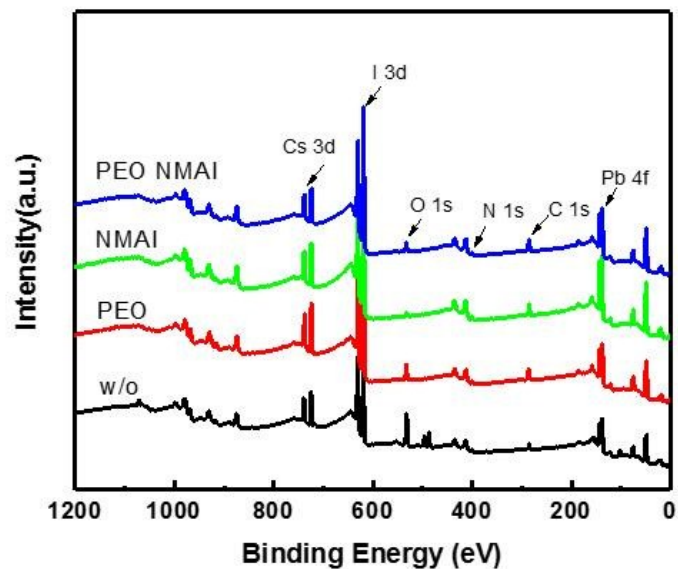

**Figure S6.** XPS survey spectra of  $\text{Cs}_{0.8}\text{FA}_{0.2}\text{PbI}_3$  films with no-addition, containing PEO, containing NMAI, containing PEO and NMAI.

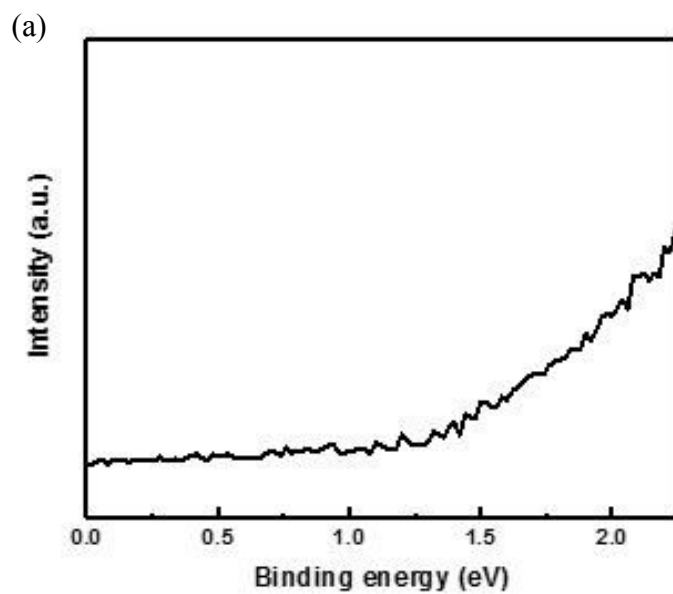

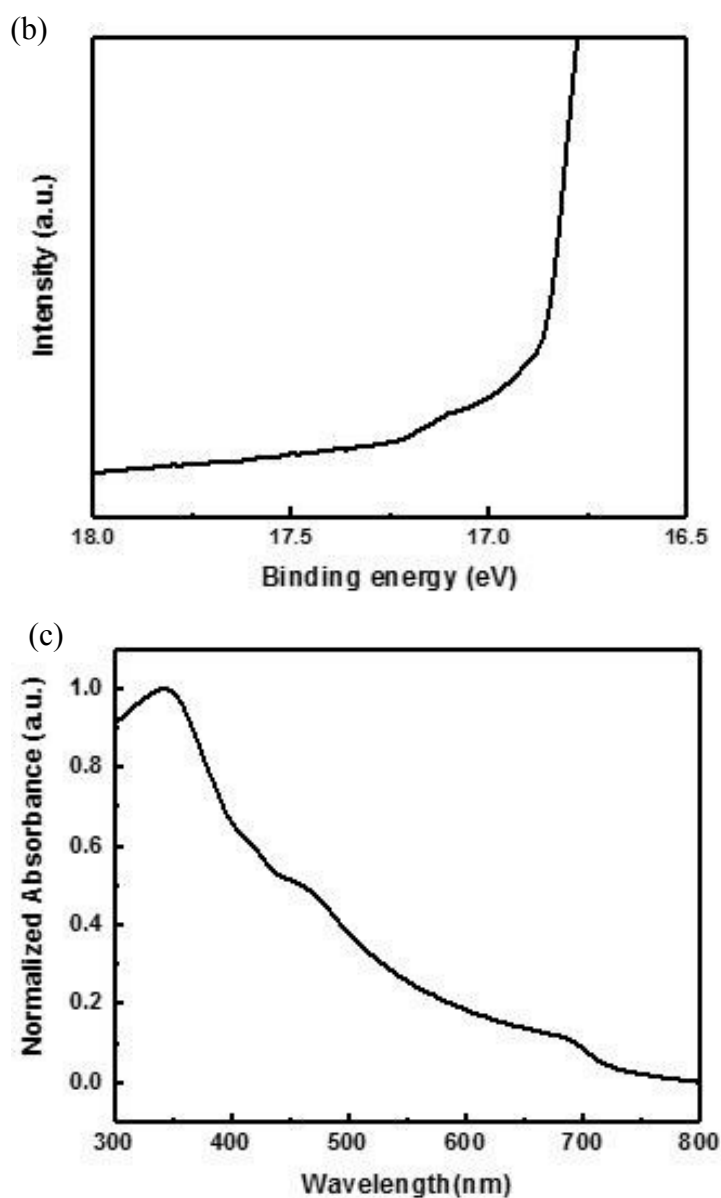

**Figure S7.** UPS spectrum of  $\text{Cs}_{0.8}\text{FA}_{0.2}\text{PbI}_3$  film containing PEO and NMAI: a) offset between WF and IE, b) secondary cut-off, and c) Absorption spectra of the film.

VB and CB of the  $\text{Cs}_{0.8}\text{FA}_{0.2}\text{PbI}_3$  film could be calculated via the valence band edge (16.91 eV), the secondary electron cut-off edge (1.25 eV) and the absorption edge (710 nm), which is 5.56 eV and 3.81 eV, respectively.

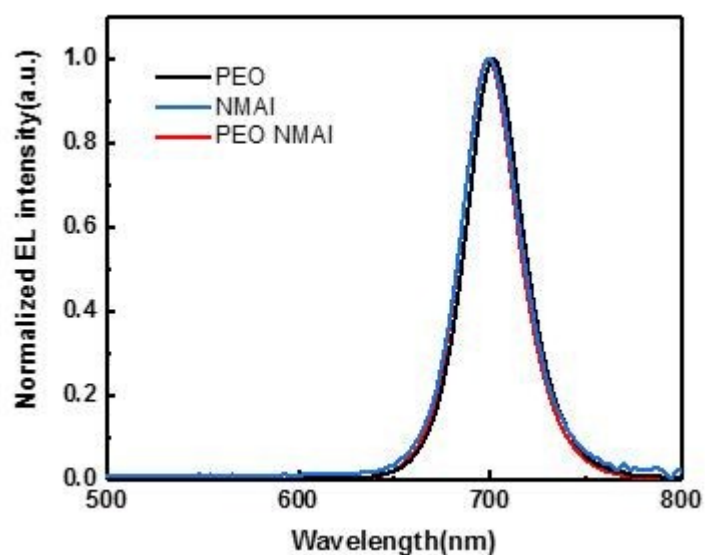

**Figure S8.** a) The Electroluminescence (EL) spectra of  $\text{Cs}_{0.8}\text{FA}_{0.2}\text{PbI}_3$  films processed with different additions.

**Table S2.** Device performance with different additions.

| Device   | EL Peak (nm) | EL FWHM (nm) | Von(V) | max L ( $\text{cd m}^{-2}$ ) | Max EQE (%) |
|----------|--------------|--------------|--------|------------------------------|-------------|
| w/o      | --           | --           | 5.4    | 2                            | 0.04        |
| PEO      | 702          | 32           | 3.4    | 32                           | 0.69        |
| NMAI     | 700          | 32           | 3.6    | 14                           | 0.08        |
| PEO NMAI | 698          | 32           | 2.9    | 176                          | 2.6         |

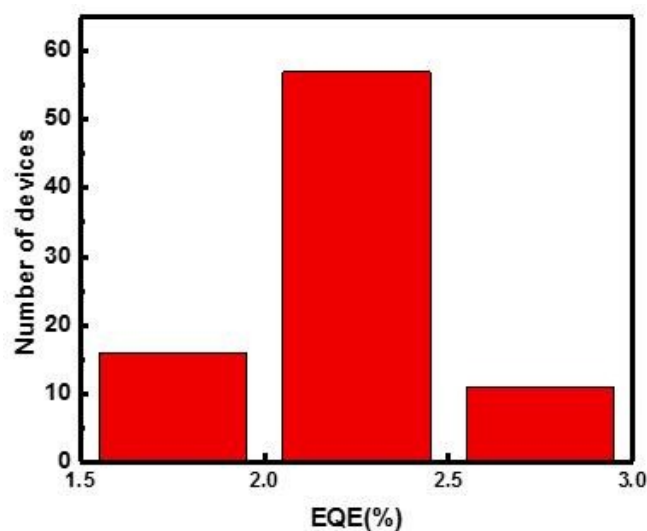

**Figure S9.** Histograms of peak EQEs for PeLED devices based on containing PEO and NMAI.

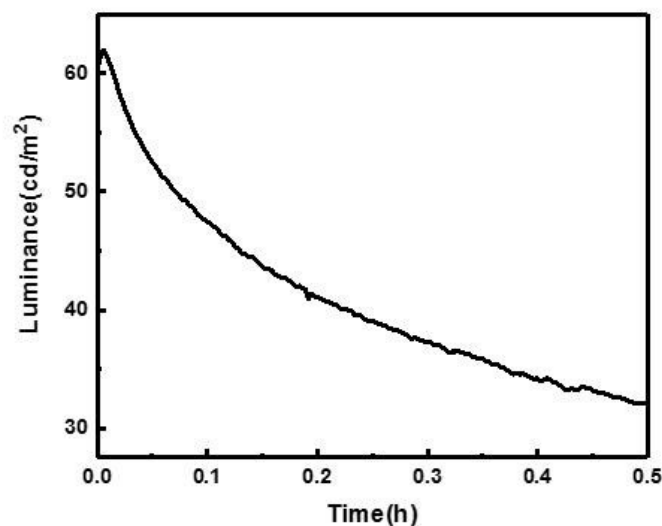

**Figure S10.** The stability of device based on containing PEO and NMAI.
